# Supplementary material
Source: HighWire-hosted journal article supplement (https://lupus.bmj.com/content/11/1/e001068)
Supplement: inline-supplementary-material-1 [file inline-supplementary-material-1.pdf]

**Supplementary Table 1.** Characteristics of included studies, total sample size, patients lost to follow-up and reported p-values.

| Study drug, trial         | Design                                                               | Arm                | Sample size | Patients lost to follow-up/withdrawn | Reported p-value | FI | RFI |
|---------------------------|----------------------------------------------------------------------|--------------------|-------------|--------------------------------------|------------------|----|-----|
| Abatacept, NCT00430677    | Double-blind, parallel-group, multicenter (85 sites).                | Abatacept, 30/10   | 298         | 25                                   | 0.806*           | -- | 9   |
|                           |                                                                      | Abatacept, 10/10   | 99          | 23                                   | 0.48*            | -- | 7   |
|                           |                                                                      | Placebo            | 100         | 22                                   |                  |    |     |
| Anifrolumab, TULIP-1      | Double-blind, parallel-group, multicenter (123 sites, 18 countries). | Anifrolumab, 300mg | 457         | 36                                   | 0.412            | -- | 27  |
|                           |                                                                      | Placebo            | 180         | 38                                   |                  |    |     |
|                           |                                                                      |                    | 184         |                                      |                  |    |     |
| Anifrolumab, TULIP-2      | Double-blind, parallel-group, multicenter (119 sites, 16 countries). | Anifrolumab, 300mg | 365         | 27                                   | 0.001            | 11 | --  |
|                           |                                                                      | Placebo            | 180         | 52                                   |                  |    |     |
|                           |                                                                      |                    | 182         |                                      |                  |    |     |
| Atacicept, APRIL-SLE      | Double-blind, parallel-group, multicenter (125 sites)                | Atacicept, 75mg    | 461         | 45                                   | 0.543            | -- | 13  |
|                           |                                                                      | Placebo            | 159         | 43                                   |                  |    |     |
|                           |                                                                      |                    | 157         |                                      |                  |    |     |
| Baricitinib, SLE-BRAVE-I  | Double-blind, parallel-group, multicenter (182 sites, 18 countries)  | Baricitinib, 2mg   | 769         | 56                                   | 0.47             | -- | 15  |
|                           |                                                                      | Baricitinib, 4mg   | 258         | 55                                   | 0.016            | 4  | --  |
|                           |                                                                      | Placebo            | 254         | 68                                   |                  |    |     |
|                           |                                                                      |                    | 257         |                                      |                  |    |     |
| Baricitinib, SLE-BRAVE-II | Double-blind, parallel-group, multicenter (162 sites, 15 countries)  | Baricitinib, 2mg   | 778         | 55                                   | 0.79             | -- | 22  |
|                           |                                                                      | Baricitinib, 4mg   | 262         | 62                                   | 0.71             | -- | 19  |
|                           |                                                                      | Placebo            | 259         | 49                                   |                  |    |     |
|                           |                                                                      |                    | 257         |                                      |                  |    |     |
| Belimumab, BLISS-52       | Double-blind, parallel-group, multicenter (90 sites, 13 countries)   | Belimumab, 10mg/kg | 867         | 49                                   | 0.0006           | 17 | --  |
|                           |                                                                      | Placebo            | 290         | 61                                   |                  |    |     |
|                           |                                                                      |                    | 287         |                                      |                  |    |     |

| Study drug, trial       | Design                                                              | Arm                    | Sample size | Patients lost to follow-up/withdrawn | Reported p-value | FI | RFI |                         |                                                                     |                      |            |    |         |    |    |                        |     |    |                         |                                                                     |                      |            |    |         |     |    |                        |     |    |                         |                                                                     |                      |            |    |         |     |    |                        |     |    |                         |                                                          |                      |            |    |         |     |    |                        |     |    |                      |                                                      |                      |            |    |         |     |    |                        |     |    |                      |                                                      |                      |            |     |         |     |    |                        |                      |                                           |                      |                                                      |           |            |    |         |                        |     |         |       |    |                     |                                                      |           |            |    |        |    |                     |                                                      |           |            |    |        |
|-------------------------|---------------------------------------------------------------------|------------------------|-------------|--------------------------------------|------------------|----|-----|-------------------------|---------------------------------------------------------------------|----------------------|------------|----|---------|----|----|------------------------|-----|----|-------------------------|---------------------------------------------------------------------|----------------------|------------|----|---------|-----|----|------------------------|-----|----|-------------------------|---------------------------------------------------------------------|----------------------|------------|----|---------|-----|----|------------------------|-----|----|-------------------------|----------------------------------------------------------|----------------------|------------|----|---------|-----|----|------------------------|-----|----|----------------------|------------------------------------------------------|----------------------|------------|----|---------|-----|----|------------------------|-----|----|----------------------|------------------------------------------------------|----------------------|------------|-----|---------|-----|----|------------------------|----------------------|-------------------------------------------|----------------------|------------------------------------------------------|-----------|------------|----|---------|------------------------|-----|---------|-------|----|---------------------|------------------------------------------------------|-----------|------------|----|--------|----|---------------------|------------------------------------------------------|-----------|------------|----|--------|
| Belimumab, BLISS-76     | Double-blind, parallel-group, multicenter (136 sites, 19 countries) | Belimumab, 10mg/kg     | 819<br>273  | 82                                   | 0.017            | 4  | --  |                         |                                                                     |                      |            |    |         |    |    |                        |     |    |                         |                                                                     |                      |            |    |         |     |    |                        |     |    |                         |                                                                     |                      |            |    |         |     |    |                        |     |    |                         |                                                          |                      |            |    |         |     |    |                        |     |    |                      |                                                      |                      |            |    |         |     |    |                        |     |    |                      |                                                      |                      |            |     |         |     |    |                        |                      |                                           |                      |                                                      |           |            |    |         |                        |     |         |       |    |                     |                                                      |           |            |    |        |    |                     |                                                      |           |            |    |        |
|                         |                                                                     | Placebo                | 275         | 89                                   |                  |    |     | Belimumab, BLISS-SC     | Double-blind, parallel-group, multicenter (177 sites, 30 countries) | Belimumab, 200mg SC  | 836<br>556 | 93 | 0.0006  | 16 | -- | Placebo                | 280 | 66 | Belimumab, BEL113750    | Double-blind, parallel-group, multicenter (49 sites, 3 countries)   | Belimumab, 10mg/kg   | 707<br>451 | 82 | <0.0001 | 15  | -- | Placebo                | 226 | 56 | Belimumab, BLISS-LN     | Double-blind, parallel-group, multicenter (107 sites, 21 countries) | Belimumab, 10mg/kg   | 448<br>223 | 76 | 0.03    | 3   | -- | Placebo                | 223 | 91 | Blisibimod, CHABLIS-SC1 | Double-blind, parallel-group, multicenter (15 countries) | Blisibimod           | 442<br>245 | 53 | 0.352   | --  | 13 | Placebo                | 197 | 44 | Epratuzumab, EMBODY1 | Double-blind, parallel-group, multicenter            | Epratuzumab 600mg QW | 793<br>248 | 94 | 0.442   | --  | 14 | Epratuzumab 1200mg Q2W | 244 | 81 | 0.175                | --                                                   | 9                    | Placebo    | 249 | 90      |     |    |                        | Epratuzumab, EMBODY2 | Double-blind, parallel-group, multicenter | Epratuzumab 600mg QW | 791<br>266                                           | 82        | 0.716      | -- | 18      | Epratuzumab 1200mg Q2W | 262 | 91      | 0.899 | -- | 21                  | Placebo                                              | 263       | 85         |    |        |    | Rituximab, EXPLORER | Double-blind, parallel-group, multicenter (55 sites) | Rituximab | 257<br>169 | 49 | 0.886* |
| Belimumab, BLISS-SC     | Double-blind, parallel-group, multicenter (177 sites, 30 countries) | Belimumab, 200mg SC    | 836<br>556  | 93                                   | 0.0006           | 16 | --  |                         |                                                                     |                      |            |    |         |    |    |                        |     |    |                         |                                                                     |                      |            |    |         |     |    |                        |     |    |                         |                                                                     |                      |            |    |         |     |    |                        |     |    |                         |                                                          |                      |            |    |         |     |    |                        |     |    |                      |                                                      |                      |            |    |         |     |    |                        |     |    |                      |                                                      |                      |            |     |         |     |    |                        |                      |                                           |                      |                                                      |           |            |    |         |                        |     |         |       |    |                     |                                                      |           |            |    |        |    |                     |                                                      |           |            |    |        |
|                         |                                                                     | Placebo                | 280         | 66                                   |                  |    |     | Belimumab, BEL113750    | Double-blind, parallel-group, multicenter (49 sites, 3 countries)   | Belimumab, 10mg/kg   | 707<br>451 | 82 | <0.0001 | 15 | -- | Placebo                | 226 | 56 | Belimumab, BLISS-LN     | Double-blind, parallel-group, multicenter (107 sites, 21 countries) | Belimumab, 10mg/kg   | 448<br>223 | 76 | 0.03    | 3   | -- | Placebo                | 223 | 91 | Blisibimod, CHABLIS-SC1 | Double-blind, parallel-group, multicenter (15 countries)            | Blisibimod           | 442<br>245 | 53 | 0.352   | --  | 13 | Placebo                | 197 | 44 | Epratuzumab, EMBODY1    | Double-blind, parallel-group, multicenter                | Epratuzumab 600mg QW | 793<br>248 | 94 | 0.442   | --  | 14 | Epratuzumab 1200mg Q2W | 244 | 81 |                      |                                                      | 0.175                | --         | 9  | Placebo | 249 | 90 |                        |     |    | Epratuzumab, EMBODY2 | Double-blind, parallel-group, multicenter            | Epratuzumab 600mg QW | 791<br>266 | 82  | 0.716   | --  | 18 | Epratuzumab 1200mg Q2W |                      |                                           | 262                  | 91                                                   | 0.899     | --         | 21 | Placebo | 263                    | 85  |         |       |    | Rituximab, EXPLORER | Double-blind, parallel-group, multicenter (55 sites) | Rituximab | 257<br>169 | 49 | 0.886* | -- | 20                  | Placebo                                              | 88        | 24         |    |        |
| Belimumab, BEL113750    | Double-blind, parallel-group, multicenter (49 sites, 3 countries)   | Belimumab, 10mg/kg     | 707<br>451  | 82                                   | <0.0001          | 15 | --  |                         |                                                                     |                      |            |    |         |    |    |                        |     |    |                         |                                                                     |                      |            |    |         |     |    |                        |     |    |                         |                                                                     |                      |            |    |         |     |    |                        |     |    |                         |                                                          |                      |            |    |         |     |    |                        |     |    |                      |                                                      |                      |            |    |         |     |    |                        |     |    |                      |                                                      |                      |            |     |         |     |    |                        |                      |                                           |                      |                                                      |           |            |    |         |                        |     |         |       |    |                     |                                                      |           |            |    |        |    |                     |                                                      |           |            |    |        |
|                         |                                                                     | Placebo                | 226         | 56                                   |                  |    |     | Belimumab, BLISS-LN     | Double-blind, parallel-group, multicenter (107 sites, 21 countries) | Belimumab, 10mg/kg   | 448<br>223 | 76 | 0.03    | 3  | -- | Placebo                | 223 | 91 | Blisibimod, CHABLIS-SC1 | Double-blind, parallel-group, multicenter (15 countries)            | Blisibimod           | 442<br>245 | 53 | 0.352   | --  | 13 | Placebo                | 197 | 44 | Epratuzumab, EMBODY1    | Double-blind, parallel-group, multicenter                           | Epratuzumab 600mg QW | 793<br>248 | 94 | 0.442   | --  | 14 | Epratuzumab 1200mg Q2W | 244 | 81 |                         |                                                          | 0.175                | --         | 9  | Placebo | 249 | 90 |                        |     |    | Epratuzumab, EMBODY2 | Double-blind, parallel-group, multicenter            | Epratuzumab 600mg QW | 791<br>266 | 82 | 0.716   | --  | 18 | Epratuzumab 1200mg Q2W | 262 | 91 |                      |                                                      | 0.899                | --         | 21  | Placebo | 263 | 85 |                        |                      |                                           | Rituximab, EXPLORER  | Double-blind, parallel-group, multicenter (55 sites) | Rituximab | 257<br>169 | 49 | 0.886*  | --                     | 20  | Placebo | 88    | 24 |                     |                                                      |           |            |    |        |    |                     |                                                      |           |            |    |        |
| Belimumab, BLISS-LN     | Double-blind, parallel-group, multicenter (107 sites, 21 countries) | Belimumab, 10mg/kg     | 448<br>223  | 76                                   | 0.03             | 3  | --  |                         |                                                                     |                      |            |    |         |    |    |                        |     |    |                         |                                                                     |                      |            |    |         |     |    |                        |     |    |                         |                                                                     |                      |            |    |         |     |    |                        |     |    |                         |                                                          |                      |            |    |         |     |    |                        |     |    |                      |                                                      |                      |            |    |         |     |    |                        |     |    |                      |                                                      |                      |            |     |         |     |    |                        |                      |                                           |                      |                                                      |           |            |    |         |                        |     |         |       |    |                     |                                                      |           |            |    |        |    |                     |                                                      |           |            |    |        |
|                         |                                                                     | Placebo                | 223         | 91                                   |                  |    |     | Blisibimod, CHABLIS-SC1 | Double-blind, parallel-group, multicenter (15 countries)            | Blisibimod           | 442<br>245 | 53 | 0.352   | -- | 13 | Placebo                | 197 | 44 | Epratuzumab, EMBODY1    | Double-blind, parallel-group, multicenter                           | Epratuzumab 600mg QW | 793<br>248 | 94 | 0.442   | --  | 14 | Epratuzumab 1200mg Q2W | 244 | 81 |                         |                                                                     | 0.175                | --         | 9  | Placebo | 249 | 90 |                        |     |    | Epratuzumab, EMBODY2    | Double-blind, parallel-group, multicenter                | Epratuzumab 600mg QW | 791<br>266 | 82 | 0.716   | --  | 18 | Epratuzumab 1200mg Q2W | 262 | 91 |                      |                                                      | 0.899                | --         | 21 | Placebo | 263 | 85 |                        |     |    | Rituximab, EXPLORER  | Double-blind, parallel-group, multicenter (55 sites) | Rituximab            | 257<br>169 | 49  | 0.886*  | --  | 20 | Placebo                | 88                   | 24                                        |                      |                                                      |           |            |    |         |                        |     |         |       |    |                     |                                                      |           |            |    |        |    |                     |                                                      |           |            |    |        |
| Blisibimod, CHABLIS-SC1 | Double-blind, parallel-group, multicenter (15 countries)            | Blisibimod             | 442<br>245  | 53                                   | 0.352            | -- | 13  |                         |                                                                     |                      |            |    |         |    |    |                        |     |    |                         |                                                                     |                      |            |    |         |     |    |                        |     |    |                         |                                                                     |                      |            |    |         |     |    |                        |     |    |                         |                                                          |                      |            |    |         |     |    |                        |     |    |                      |                                                      |                      |            |    |         |     |    |                        |     |    |                      |                                                      |                      |            |     |         |     |    |                        |                      |                                           |                      |                                                      |           |            |    |         |                        |     |         |       |    |                     |                                                      |           |            |    |        |    |                     |                                                      |           |            |    |        |
|                         |                                                                     | Placebo                | 197         | 44                                   |                  |    |     | Epratuzumab, EMBODY1    | Double-blind, parallel-group, multicenter                           | Epratuzumab 600mg QW | 793<br>248 | 94 | 0.442   | -- | 14 | Epratuzumab 1200mg Q2W | 244 | 81 |                         |                                                                     | 0.175                | --         | 9  | Placebo | 249 | 90 |                        |     |    | Epratuzumab, EMBODY2    | Double-blind, parallel-group, multicenter                           | Epratuzumab 600mg QW | 791<br>266 | 82 | 0.716   | --  | 18 | Epratuzumab 1200mg Q2W | 262 | 91 |                         |                                                          | 0.899                | --         | 21 | Placebo | 263 | 85 |                        |     |    | Rituximab, EXPLORER  | Double-blind, parallel-group, multicenter (55 sites) | Rituximab            | 257<br>169 | 49 | 0.886*  | --  | 20 | Placebo                | 88  | 24 |                      |                                                      |                      |            |     |         |     |    |                        |                      |                                           |                      |                                                      |           |            |    |         |                        |     |         |       |    |                     |                                                      |           |            |    |        |    |                     |                                                      |           |            |    |        |
| Epratuzumab, EMBODY1    | Double-blind, parallel-group, multicenter                           | Epratuzumab 600mg QW   | 793<br>248  | 94                                   | 0.442            | -- | 14  |                         |                                                                     |                      |            |    |         |    |    |                        |     |    |                         |                                                                     |                      |            |    |         |     |    |                        |     |    |                         |                                                                     |                      |            |    |         |     |    |                        |     |    |                         |                                                          |                      |            |    |         |     |    |                        |     |    |                      |                                                      |                      |            |    |         |     |    |                        |     |    |                      |                                                      |                      |            |     |         |     |    |                        |                      |                                           |                      |                                                      |           |            |    |         |                        |     |         |       |    |                     |                                                      |           |            |    |        |    |                     |                                                      |           |            |    |        |
|                         |                                                                     | Epratuzumab 1200mg Q2W | 244         | 81                                   | 0.175            | -- | 9   |                         |                                                                     |                      |            |    |         |    |    |                        |     |    |                         |                                                                     |                      |            |    |         |     |    |                        |     |    |                         |                                                                     |                      |            |    |         |     |    |                        |     |    |                         |                                                          |                      |            |    |         |     |    |                        |     |    |                      |                                                      |                      |            |    |         |     |    |                        |     |    |                      |                                                      |                      |            |     |         |     |    |                        |                      |                                           |                      |                                                      |           |            |    |         |                        |     |         |       |    |                     |                                                      |           |            |    |        |    |                     |                                                      |           |            |    |        |
|                         |                                                                     | Placebo                | 249         | 90                                   |                  |    |     |                         |                                                                     |                      |            |    |         |    |    |                        |     |    |                         |                                                                     |                      |            |    |         |     |    |                        |     |    |                         |                                                                     |                      |            |    |         |     |    |                        |     |    |                         |                                                          |                      |            |    |         |     |    |                        |     |    |                      |                                                      |                      |            |    |         |     |    |                        |     |    |                      |                                                      |                      |            |     |         |     |    |                        |                      |                                           |                      |                                                      |           |            |    |         |                        |     |         |       |    |                     |                                                      |           |            |    |        |    |                     |                                                      |           |            |    |        |
| Epratuzumab, EMBODY2    | Double-blind, parallel-group, multicenter                           | Epratuzumab 600mg QW   | 791<br>266  | 82                                   | 0.716            | -- | 18  |                         |                                                                     |                      |            |    |         |    |    |                        |     |    |                         |                                                                     |                      |            |    |         |     |    |                        |     |    |                         |                                                                     |                      |            |    |         |     |    |                        |     |    |                         |                                                          |                      |            |    |         |     |    |                        |     |    |                      |                                                      |                      |            |    |         |     |    |                        |     |    |                      |                                                      |                      |            |     |         |     |    |                        |                      |                                           |                      |                                                      |           |            |    |         |                        |     |         |       |    |                     |                                                      |           |            |    |        |    |                     |                                                      |           |            |    |        |
|                         |                                                                     | Epratuzumab 1200mg Q2W | 262         | 91                                   | 0.899            | -- | 21  |                         |                                                                     |                      |            |    |         |    |    |                        |     |    |                         |                                                                     |                      |            |    |         |     |    |                        |     |    |                         |                                                                     |                      |            |    |         |     |    |                        |     |    |                         |                                                          |                      |            |    |         |     |    |                        |     |    |                      |                                                      |                      |            |    |         |     |    |                        |     |    |                      |                                                      |                      |            |     |         |     |    |                        |                      |                                           |                      |                                                      |           |            |    |         |                        |     |         |       |    |                     |                                                      |           |            |    |        |    |                     |                                                      |           |            |    |        |
|                         |                                                                     | Placebo                | 263         | 85                                   |                  |    |     |                         |                                                                     |                      |            |    |         |    |    |                        |     |    |                         |                                                                     |                      |            |    |         |     |    |                        |     |    |                         |                                                                     |                      |            |    |         |     |    |                        |     |    |                         |                                                          |                      |            |    |         |     |    |                        |     |    |                      |                                                      |                      |            |    |         |     |    |                        |     |    |                      |                                                      |                      |            |     |         |     |    |                        |                      |                                           |                      |                                                      |           |            |    |         |                        |     |         |       |    |                     |                                                      |           |            |    |        |    |                     |                                                      |           |            |    |        |
| Rituximab, EXPLORER     | Double-blind, parallel-group, multicenter (55 sites)                | Rituximab              | 257<br>169  | 49                                   | 0.886*           | -- | 20  |                         |                                                                     |                      |            |    |         |    |    |                        |     |    |                         |                                                                     |                      |            |    |         |     |    |                        |     |    |                         |                                                                     |                      |            |    |         |     |    |                        |     |    |                         |                                                          |                      |            |    |         |     |    |                        |     |    |                      |                                                      |                      |            |    |         |     |    |                        |     |    |                      |                                                      |                      |            |     |         |     |    |                        |                      |                                           |                      |                                                      |           |            |    |         |                        |     |         |       |    |                     |                                                      |           |            |    |        |    |                     |                                                      |           |            |    |        |
|                         |                                                                     | Placebo                | 88          | 24                                   |                  |    |     |                         |                                                                     |                      |            |    |         |    |    |                        |     |    |                         |                                                                     |                      |            |    |         |     |    |                        |     |    |                         |                                                                     |                      |            |    |         |     |    |                        |     |    |                         |                                                          |                      |            |    |         |     |    |                        |     |    |                      |                                                      |                      |            |    |         |     |    |                        |     |    |                      |                                                      |                      |            |     |         |     |    |                        |                      |                                           |                      |                                                      |           |            |    |         |                        |     |         |       |    |                     |                                                      |           |            |    |        |    |                     |                                                      |           |            |    |        |

| Study drug, trial       | Design                                                              | Arm                 | Sample size | Patients lost to follow-up/withdrawn | Reported p-value | FI | RFI |                         |                                           |                     |      |    |       |    |    |                     |     |    |       |    |   |         |     |    |  |  |  |                         |                                           |                     |      |    |       |    |    |                     |     |    |        |   |    |         |     |    |  |  |  |                    |                                                                     |             |     |     |       |    |    |         |     |     |                       |                                                                     |             |     |    |        |
|-------------------------|---------------------------------------------------------------------|---------------------|-------------|--------------------------------------|------------------|----|-----|-------------------------|-------------------------------------------|---------------------|------|----|-------|----|----|---------------------|-----|----|-------|----|---|---------|-----|----|--|--|--|-------------------------|-------------------------------------------|---------------------|------|----|-------|----|----|---------------------|-----|----|--------|---|----|---------|-----|----|--|--|--|--------------------|---------------------------------------------------------------------|-------------|-----|-----|-------|----|----|---------|-----|-----|-----------------------|---------------------------------------------------------------------|-------------|-----|----|--------|
| Rituximab, LUNAR        | Double-blind, parallel-group, multicenter (52 sites)                | Rituximab           | 144         | 7                                    | 0.55             | -- | 16  |                         |                                           |                     |      |    |       |    |    |                     |     |    |       |    |   |         |     |    |  |  |  |                         |                                           |                     |      |    |       |    |    |                     |     |    |        |   |    |         |     |    |  |  |  |                    |                                                                     |             |     |     |       |    |    |         |     |     |                       |                                                                     |             |     |    |        |
|                         |                                                                     | Placebo             | 72          | 18                                   |                  |    |     | Tabalumab, ILLUMINATE-1 | Double-blind, parallel-group, multicenter | Tabalumab 120mg Q2W | 1138 | 82 | 0.409 | -- | 17 | Tabalumab 120mg Q4W | 381 | 87 | 0.052 | -- | 4 | Placebo | 378 | 95 |  |  |  | Tabalumab, ILLUMINATE-2 | Double-blind, parallel-group, multicenter | Tabalumab 120mg Q2W | 1124 | 77 | 0.002 | 15 | -- | Tabalumab 120mg Q4W | 372 | 87 | 0.041* | 2 | -- | Placebo | 376 | 88 |  |  |  | Ustekinumab, LOTUS | Double-blind, parallel-group, multicenter (140 sites, 20 countries) | Ustekinumab | 516 | 155 | 1.00* | -- | 22 | Placebo | 308 | 103 | Voclosporin, AURORA-1 | Double-blind, parallel-group, multicenter (142 sites, 27 countries) | Voclosporin | 357 | 15 | <0.001 |
| Tabalumab, ILLUMINATE-1 | Double-blind, parallel-group, multicenter                           | Tabalumab 120mg Q2W | 1138        | 82                                   | 0.409            | -- | 17  |                         |                                           |                     |      |    |       |    |    |                     |     |    |       |    |   |         |     |    |  |  |  |                         |                                           |                     |      |    |       |    |    |                     |     |    |        |   |    |         |     |    |  |  |  |                    |                                                                     |             |     |     |       |    |    |         |     |     |                       |                                                                     |             |     |    |        |
|                         |                                                                     | Tabalumab 120mg Q4W | 381         | 87                                   | 0.052            | -- | 4   |                         |                                           |                     |      |    |       |    |    |                     |     |    |       |    |   |         |     |    |  |  |  |                         |                                           |                     |      |    |       |    |    |                     |     |    |        |   |    |         |     |    |  |  |  |                    |                                                                     |             |     |     |       |    |    |         |     |     |                       |                                                                     |             |     |    |        |
|                         |                                                                     | Placebo             | 378         | 95                                   |                  |    |     |                         |                                           |                     |      |    |       |    |    |                     |     |    |       |    |   |         |     |    |  |  |  |                         |                                           |                     |      |    |       |    |    |                     |     |    |        |   |    |         |     |    |  |  |  |                    |                                                                     |             |     |     |       |    |    |         |     |     |                       |                                                                     |             |     |    |        |
| Tabalumab, ILLUMINATE-2 | Double-blind, parallel-group, multicenter                           | Tabalumab 120mg Q2W | 1124        | 77                                   | 0.002            | 15 | --  |                         |                                           |                     |      |    |       |    |    |                     |     |    |       |    |   |         |     |    |  |  |  |                         |                                           |                     |      |    |       |    |    |                     |     |    |        |   |    |         |     |    |  |  |  |                    |                                                                     |             |     |     |       |    |    |         |     |     |                       |                                                                     |             |     |    |        |
|                         |                                                                     | Tabalumab 120mg Q4W | 372         | 87                                   | 0.041*           | 2  | --  |                         |                                           |                     |      |    |       |    |    |                     |     |    |       |    |   |         |     |    |  |  |  |                         |                                           |                     |      |    |       |    |    |                     |     |    |        |   |    |         |     |    |  |  |  |                    |                                                                     |             |     |     |       |    |    |         |     |     |                       |                                                                     |             |     |    |        |
|                         |                                                                     | Placebo             | 376         | 88                                   |                  |    |     |                         |                                           |                     |      |    |       |    |    |                     |     |    |       |    |   |         |     |    |  |  |  |                         |                                           |                     |      |    |       |    |    |                     |     |    |        |   |    |         |     |    |  |  |  |                    |                                                                     |             |     |     |       |    |    |         |     |     |                       |                                                                     |             |     |    |        |
| Ustekinumab, LOTUS      | Double-blind, parallel-group, multicenter (140 sites, 20 countries) | Ustekinumab         | 516         | 155                                  | 1.00*            | -- | 22  |                         |                                           |                     |      |    |       |    |    |                     |     |    |       |    |   |         |     |    |  |  |  |                         |                                           |                     |      |    |       |    |    |                     |     |    |        |   |    |         |     |    |  |  |  |                    |                                                                     |             |     |     |       |    |    |         |     |     |                       |                                                                     |             |     |    |        |
|                         |                                                                     | Placebo             | 308         | 103                                  |                  |    |     |                         |                                           |                     |      |    |       |    |    |                     |     |    |       |    |   |         |     |    |  |  |  |                         |                                           |                     |      |    |       |    |    |                     |     |    |        |   |    |         |     |    |  |  |  |                    |                                                                     |             |     |     |       |    |    |         |     |     |                       |                                                                     |             |     |    |        |
| Voclosporin, AURORA-1   | Double-blind, parallel-group, multicenter (142 sites, 27 countries) | Voclosporin         | 357         | 15                                   | <0.001           | 15 | --  |                         |                                           |                     |      |    |       |    |    |                     |     |    |       |    |   |         |     |    |  |  |  |                         |                                           |                     |      |    |       |    |    |                     |     |    |        |   |    |         |     |    |  |  |  |                    |                                                                     |             |     |     |       |    |    |         |     |     |                       |                                                                     |             |     |    |        |
|                         |                                                                     | Placebo             | 179         | 31                                   |                  |    |     |                         |                                           |                     |      |    |       |    |    |                     |     |    |       |    |   |         |     |    |  |  |  |                         |                                           |                     |      |    |       |    |    |                     |     |    |        |   |    |         |     |    |  |  |  |                    |                                                                     |             |     |     |       |    |    |         |     |     |                       |                                                                     |             |     |    |        |

\*Not reported in original article. Two-sided Fisher's exact test.
